# Supplementary material for: Algorithm based smartphone apps to assess risk of skin cancer in adults: systematic review of diagnostic accuracy studies
Source: PubMed Central journal article supplement (PMC7190019; doi:10.1136/bmj.m127), 2020-02-10
Supplement: frek052868.ww2.pdf [file frek052868.ww2.pdf]

## Supplementary Figure 1 PRISMA flow diagram of study inclusion

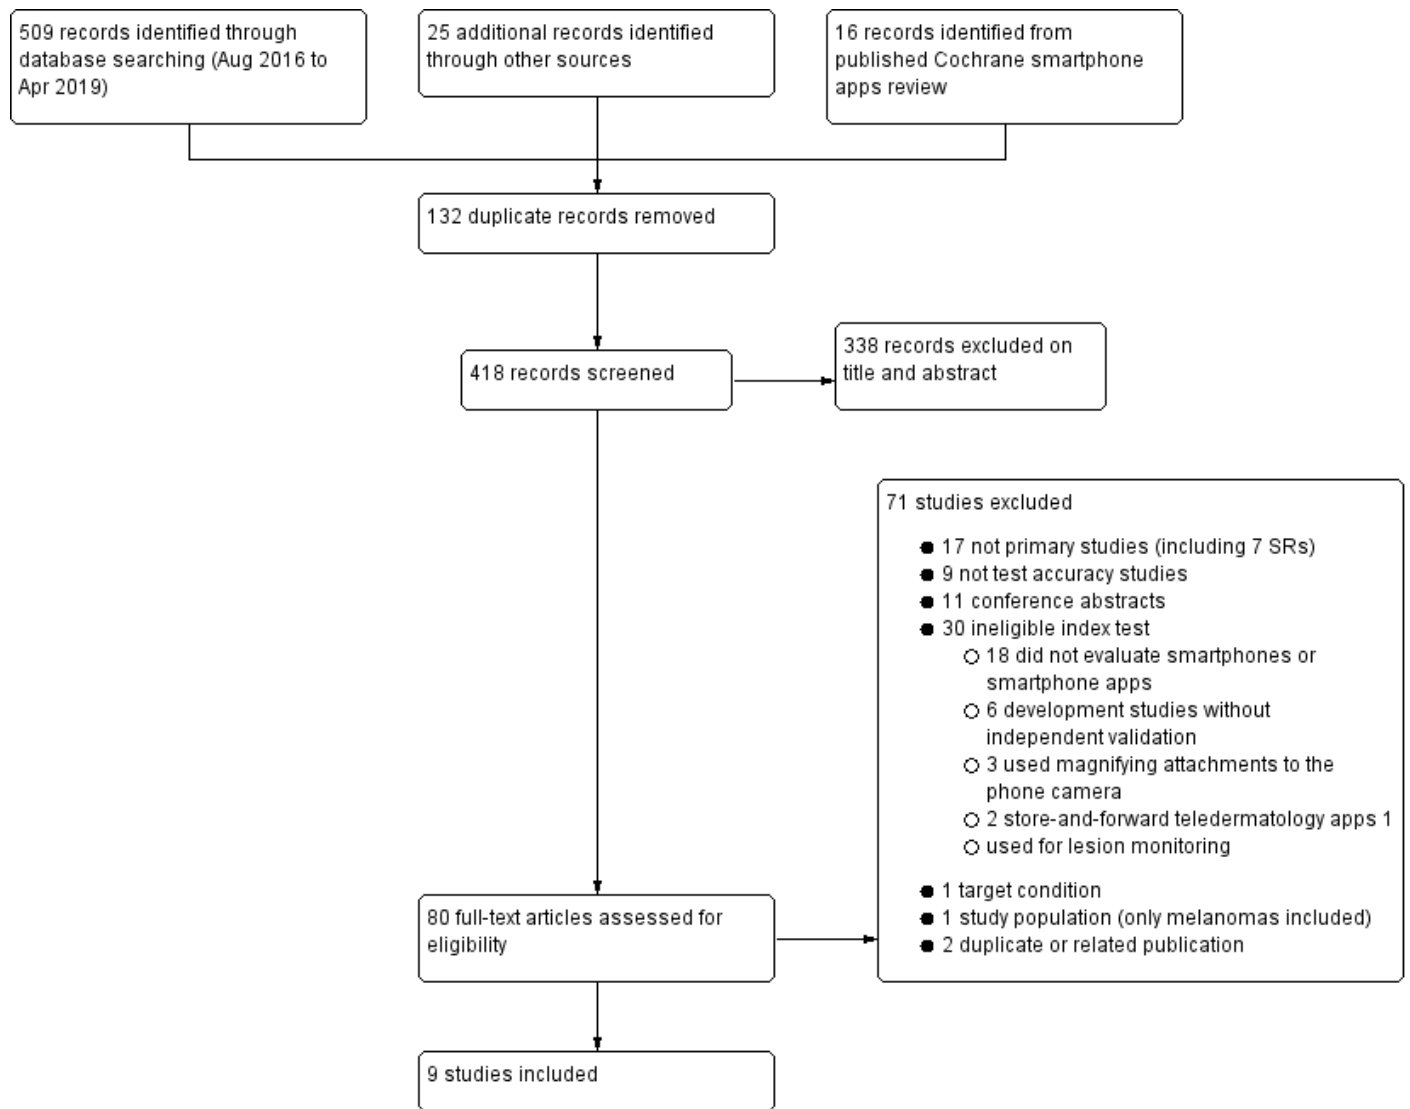

## Supplementary Figure 2 Forest plot of sensitivity and specificity for evaluations of all other identified apps

### Uncertain availability - all thresholds - accuracy compared to histology with or without follow-up

| Study                              | TP | FP | FN | TN | Mobile platform | Unevaluables      | Sensitivity (95% CI) | Specificity (95% CI) |
|------------------------------------|----|----|----|----|-----------------|-------------------|----------------------|----------------------|
| Chadwick 2014 - Dr Mole - H vs M/L | 4  | 4  | 1  | 6  | Android         | Excluded a priori | 0.80 [0.28, 0.99]    | 0.60 [0.26, 0.88]    |
| Chadwick 2014 - Dr Mole - H/M vs L | 5  | 6  | 0  | 4  | Android         | Excluded a priori | 1.00 [0.48, 1.00]    | 0.40 [0.12, 0.74]    |
| Chadwick 2014 - SpotMole - H vs L  | 4  | 4  | 1  | 6  | Android         | Excluded a priori | 0.80 [0.28, 0.99]    | 0.60 [0.26, 0.88]    |

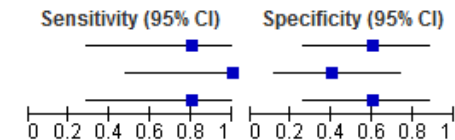

### Uncertain availability - all thresholds - accuracy compared to expert recommendation for further investigation/intervention

| Study                                    | TP | FP | FN | TN | Mobile platform | Unevaluables | Sensitivity (95% CI) | Specificity (95% CI) |
|------------------------------------------|----|----|----|----|-----------------|--------------|----------------------|----------------------|
| Ngoo 2018 - Dr Mole - H vs M/L           | 9  | 0  | 33 | 15 | Android         | 0            | 0.21 [0.10, 0.37]    | 1.00 [0.78, 1.00]    |
| Ngoo 2018 - Spotmole (direct) - H vs L   | 18 | 3  | 24 | 12 | Android         | 0            | 0.43 [0.28, 0.59]    | 0.80 [0.52, 0.96]    |
| Ngoo 2018 - Spotmole (indirect) - H vs L | 18 | 4  | 24 | 11 | Android         | 0            | 0.43 [0.28, 0.59]    | 0.73 [0.45, 0.92]    |

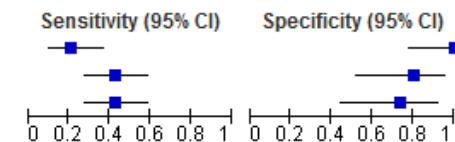

### Withdrawn apps - all thresholds - accuracy compared to histology with or without follow-up

| Study                                     | TP | FP | FN | TN | Mobile platform | Unevaluables      | Sensitivity (95% CI) | Specificity (95% CI) |
|-------------------------------------------|----|----|----|----|-----------------|-------------------|----------------------|----------------------|
| Chadwick 2014 - MelApp - H vs M/L         | 0  | 0  | 4  | 5  | Android         | 6                 | 0.00 [0.00, 0.60]    | 1.00 [0.48, 1.00]    |
| Chadwick 2014 - MelApp - H/M vs L         | 1  | 0  | 3  | 5  | Android         | 6                 | 0.25 [0.01, 0.81]    | 1.00 [0.48, 1.00]    |
| Chadwick 2014 - Mole Detective - H vs M/L | 4  | 8  | 1  | 2  | Android         | Excluded a priori | 0.80 [0.28, 0.99]    | 0.20 [0.03, 0.56]    |
| Chadwick 2014 - Mole Detective - H/M vs L | 5  | 8  | 0  | 2  | Android         | Excluded a priori | 1.00 [0.48, 1.00]    | 0.20 [0.03, 0.56]    |
| Robson 2012 - MelApp - H vs M/L           | 1  | 2  | 1  | 17 | iOS             | 14                | 0.50 [0.01, 0.99]    | 0.89 [0.67, 0.99]    |
| Robson 2012 - MelApp - H/M vs L           | 1  | 4  | 1  | 15 | iOS             | 14                | 0.50 [0.01, 0.99]    | 0.79 [0.54, 0.94]    |

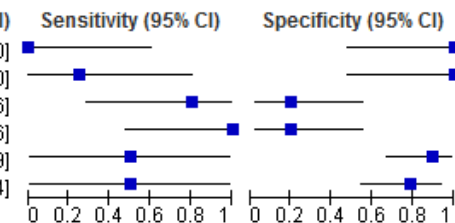

### Unidentified apps - all thresholds - accuracy compared to histology with or without follow-up

| Study                            | TP | FP | FN | TN  | Mobile platform | Unevaluables | Sensitivity (95% CI) | Specificity (95% CI) |
|----------------------------------|----|----|----|-----|-----------------|--------------|----------------------|----------------------|
| Dorairaj 2017 - App A - H vs M/L | 1  | 5  | 8  | 12  | NR              | 6            | 0.11 [0.00, 0.48]    | 0.71 [0.44, 0.90]    |
| Dorairaj 2017 - App A - H/M vs L | 9  | 14 | 0  | 3   | NR              | 6            | 1.00 [0.66, 1.00]    | 0.18 [0.04, 0.43]    |
| Wolf 2013 - App 1 - H vs L       | 42 | 74 | 18 | 48  | NR              | 6            | 0.70 [0.57, 0.81]    | 0.39 [0.31, 0.49]    |
| Wolf 2013 - App 2 - H vs L       | 40 | 80 | 18 | 47  | NR              | 3            | 0.69 [0.55, 0.80]    | 0.37 [0.29, 0.46]    |
| Wolf 2013 - App 3 - H vs M/L     | 4  | 7  | 55 | 104 | NR              | 17           | 0.07 [0.02, 0.16]    | 0.94 [0.87, 0.97]    |
| Wolf 2013 - App 3 - H/M vs L     | 32 | 43 | 27 | 68  | NR              | 17           | 0.54 [0.41, 0.67]    | 0.61 [0.52, 0.70]    |

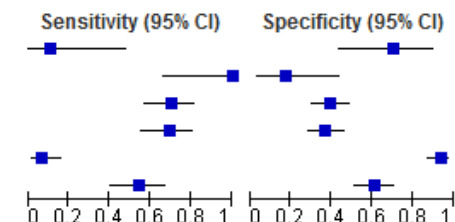

Where possible, data are presented considering only high risk results as test positive, and also considering both high and moderate risk results as test positive.

Spotmole (direct) – uses images taken from within the app; Spotmole (indirect) – uploads images from the smartphone photo library; FN – false negative, FP – false positive, H – high risk, L – low risk, M – moderate risk, TN – true negative, TP – true positive
